# Supplementary material for: Plant-extract-infused edible films as natural antimicrobial and antioxidant packaging for chicken meat
Source: Royal Society of Chemistry journal article supplement (doi:10.1039/d5fb00553a), 2025-12-15
Supplement: d5fb00553a1.pdf [file d5fb00553a1.pdf]

**Supplementary Table S1. Film Optimization Results for Pongamia pinnata Extract**

| <b>Extract Concentration (% v/v)</b> | <b>Visual Appearance</b>   | <b>Film Integrity</b>       | <b>Tensile Strength (MPa)</b>     | <b>Notes</b>                                            |
|--------------------------------------|----------------------------|-----------------------------|-----------------------------------|---------------------------------------------------------|
| <b>1%</b>                            | Transparent, slightly pale | Fragile, incomplete film    | $1.05 \pm 0.06$                   | Low extract insufficient for film network reinforcement |
| <b>3%</b>                            | Transparent                | Moderate - slightly brittle | $1.78 \pm 0.05$                   | Improved but still weak cohesion                        |
| <b>5%</b>                            | Uniform, flexible          | Good - smooth, continuous   | <b><math>2.47 \pm 0.08</math></b> | Optimal concentration                                   |
| <b>7%</b>                            | Dark, slightly opaque      | Brittle, surface cracks     | $1.39 \pm 0.07$                   | High extract interferes with polymer interactions       |

**Supplementary Table S2. Film Optimization Results for Psidium guajava Extract**

| <b>Extract Concentration (% v/v)</b> | <b>Visual Appearance</b> | <b>Film Integrity</b>     | <b>Tensile Strength (MPa)</b>     | <b>Notes</b>                   |
|--------------------------------------|--------------------------|---------------------------|-----------------------------------|--------------------------------|
| <b>1%</b>                            | Very transparent         | Weak, fragile             | $1.12 \pm 0.05$                   | Poor structural cohesion       |
| <b>3%</b>                            | Light yellow tint        | Moderate                  | $1.86 \pm 0.06$                   | Better film formation          |
| <b>5%</b>                            | Slight yellow, uniform   | Good - flexible, cohesive | <b><math>2.57 \pm 0.09</math></b> | Selected for final formulation |
| <b>7%</b>                            | Dark yellow, opaque      | Brittle, uneven           | $1.45 \pm 0.08$                   | Excess extract disrupts matrix |
